# Supplementary material
Source: PubMed Central journal article supplement (PMC3089517)
Supplement: supp_M111.225383_jbc.M111.225383-8.pdf [file supp_M111.225383_jbc.M111.225383-8.pdf]

## Supplemental Data

*Giddings et al.* - “A stereoselective hydroxylation step of alkaloid biosynthesis in *Catharanthus roseus*”

```

Locus_88716      AAACAAC TAGATTTCTCTAGCAAGAAAAATATGTTGTCTTCATTGAAAGATTTCTTCGTT
Locus_88716      CTACTTCTGCCTTTCTTCATTGGCATTGCATTTATATATAAATATGGAATTTTACATCC
Locus_88716      AAGAAAAATCTTCCGCCATCGCCAAGAAGGCTACCGATTATCGGAAACCTTCATCAGCTC
Locus_88716      AGTAAATTTCTCAACGTTCACTGAGAACATTATCAGAAAAATATGGGCCTGTCATGTTA
Locus_88716      CTCATTTTGGTAGCAAGCCAGTTTTGGTTATATCCTCAGCAGAAGCAGCTAAAGAAGTA
Locus_88716      ATGAAAATCAATGATGTTTCTTCGCTGATAGGCCTAAATGGTATGCTGCTGGTAGGGTT
Locus_88716      CTTTATGAATTTAAGGATATGACATTTTCACCCATGGTGAGTATTGGAGACAAGCTAGA
Locus_87898      GGTGAGTATTGGAGACAAGCTAGA
Locus_87898      AGTATATGTGTTCTTCAGCTTCTAAGTAACAAAAGGGTTCAATCTTTTAAAGGTATTAGA
Locus_87898      GAAGAAGAGATAAAGGCAATGTTGGAATAAATAAATCAAGCTAGTAATAATTCAGTATC
Locus_87898      ATTAATGGTGATGAGATTTTCTCGACACTTACAAATGACATAATTGGAAGATCTCCTTTT
Locus_87898      GGGAGGAAATTTTCTGAAGAAGAAAGTGAAGTAAATTAAGAAAAGTCTTCAAGATTTG
Locus_87898      CCACCTTGTAGGTTCTTTCAATGTTGGTGATTTTATTCCATGGCTTCTTGGGTTAAT
Locus_87898      TATTTAAATGGTTTTGAAAAAAATGAACCAAGTTTCAAAAGATTGTGATCAATATCTT
Locus_87898      GAGCAAGTTATTGATGATACGAGGAAGAGAGATGAAGAAAATGGAGCTAATAACAATGGC
Locus_87898      GGAAATCATGGAAATTTTGTAGTGTCTACTTCATCTCCAGAAAGAAGATGTCAAGGGT
Locus_87898      TTTCCTTCAGAAAAGATTTTCTTAAAGCTATCATTTTGGACATGATGTTGGGGGAACA
Locus_87898      GACACAACACATTTGCTTTTGCATTGGGTAATCACAGAGCTTCTCAAAAACAAAGATGTA
Locus_87898      ATGACTAAATTACAAAAGAGGTGAGAGAAATAGTCGGAAGAAAATGGAGATAACTGAT
Locus_87898      GAAGACAAAGAAAAATGAAATATTTACACGCAGTTATAAAAGAGGCACTCCGGTTACAT
Locus_87898      CCTTCTCTCCTTTACTCGTTCACAGAGTAGCAAGAGAGGATATAAACCTAATGGGTTAT
Locus_87898      CGCGTAGCGAAAGGCACAGAAGTGATTATTAATGCTTGGGCAATAGCGAGAGATCCATCG
Locus_87898      TACTGGGATGAAGCCGAGGAGTTAAGCCGGAGAGATTCTTGAGTAATAATTTGATTTT
Locus_87898      AAAGGACTTAATTTGAGTATATCCATTTGGTCTGGAAGAAGAAGTTGCCCTGGATCT
Locus_87898      TCATTTGCAATCCCATTGTAGAACACACAGTGGCACATTTGATGCATAAATTCATATT
Locus_87898      GAGTTGCCAAATGGAGTCAGTCTGAAGATTTTGTCCACAGATGCCGTTGGACTCGTA
Locus_87898      TCTCATGACCAAAACCTCTCTCGTTTTGTGGCAACTCCGGTTACCATTTTTACTTTT
Locus_87898      CACTCGGTGCTAAGTAAAAGGTTCAAATAGTTTA

```

**Figure S1.** Assembly of Locus\_88716 and Locus\_87898 to form SOC-001 contig. Overlapping region is in bold. Start codon is highlighted in green. Stop codon is highlighted in red.

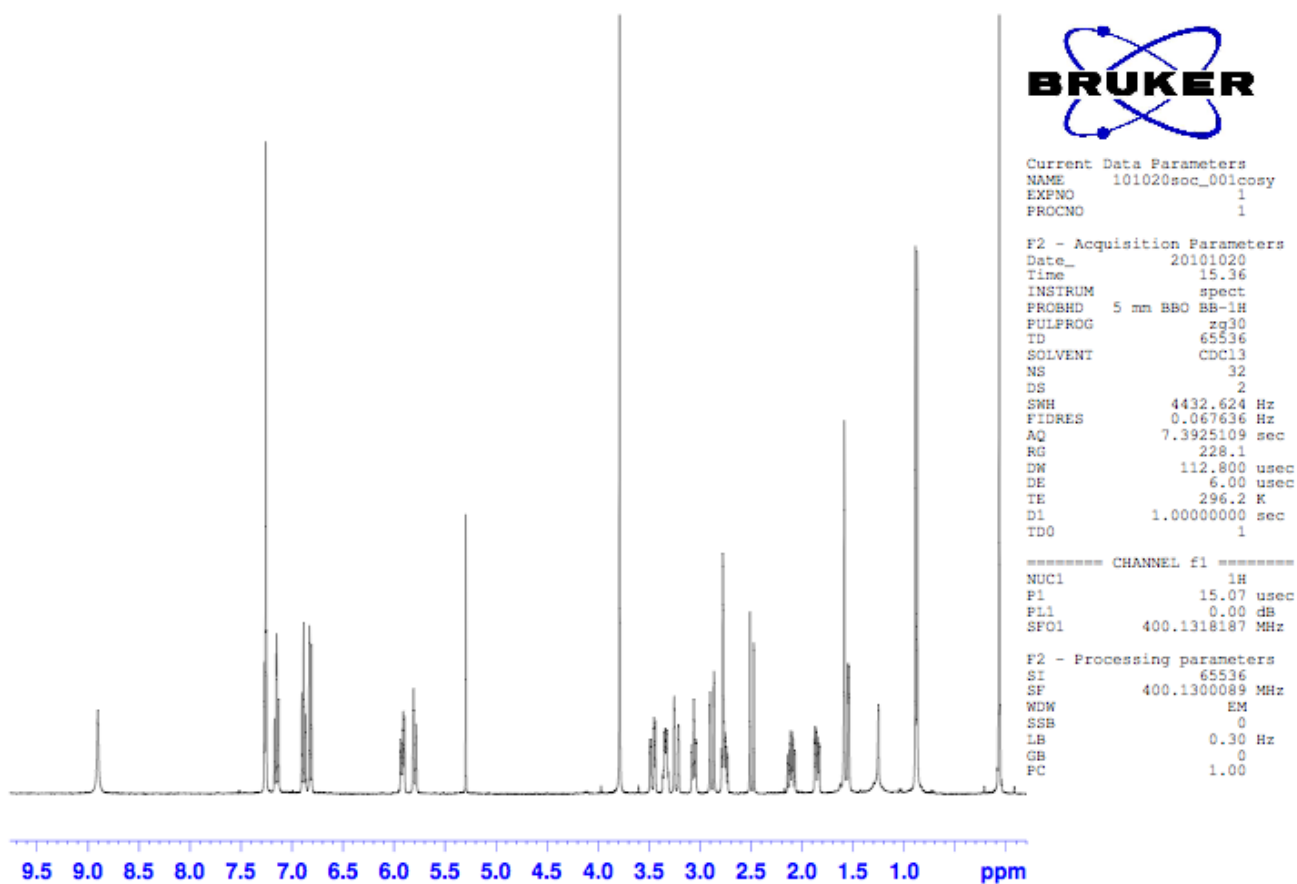

**Figure S2.** <sup>1</sup>H NMR spectrum of 19-hydroxytabersonine.

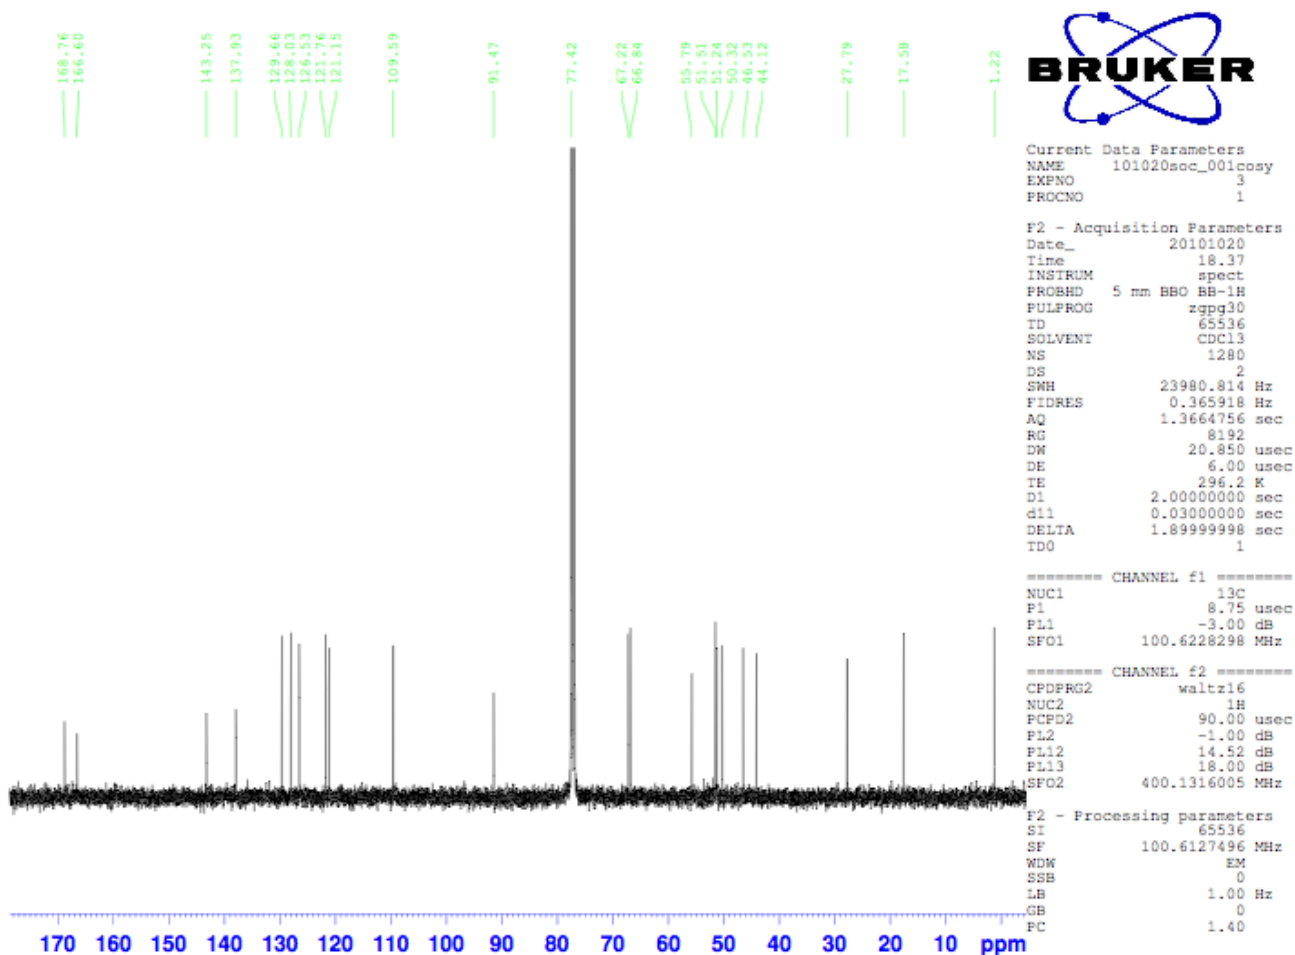

Figure S3. <sup>13</sup>C NMR spectrum of 19-hydroxytabersonine.

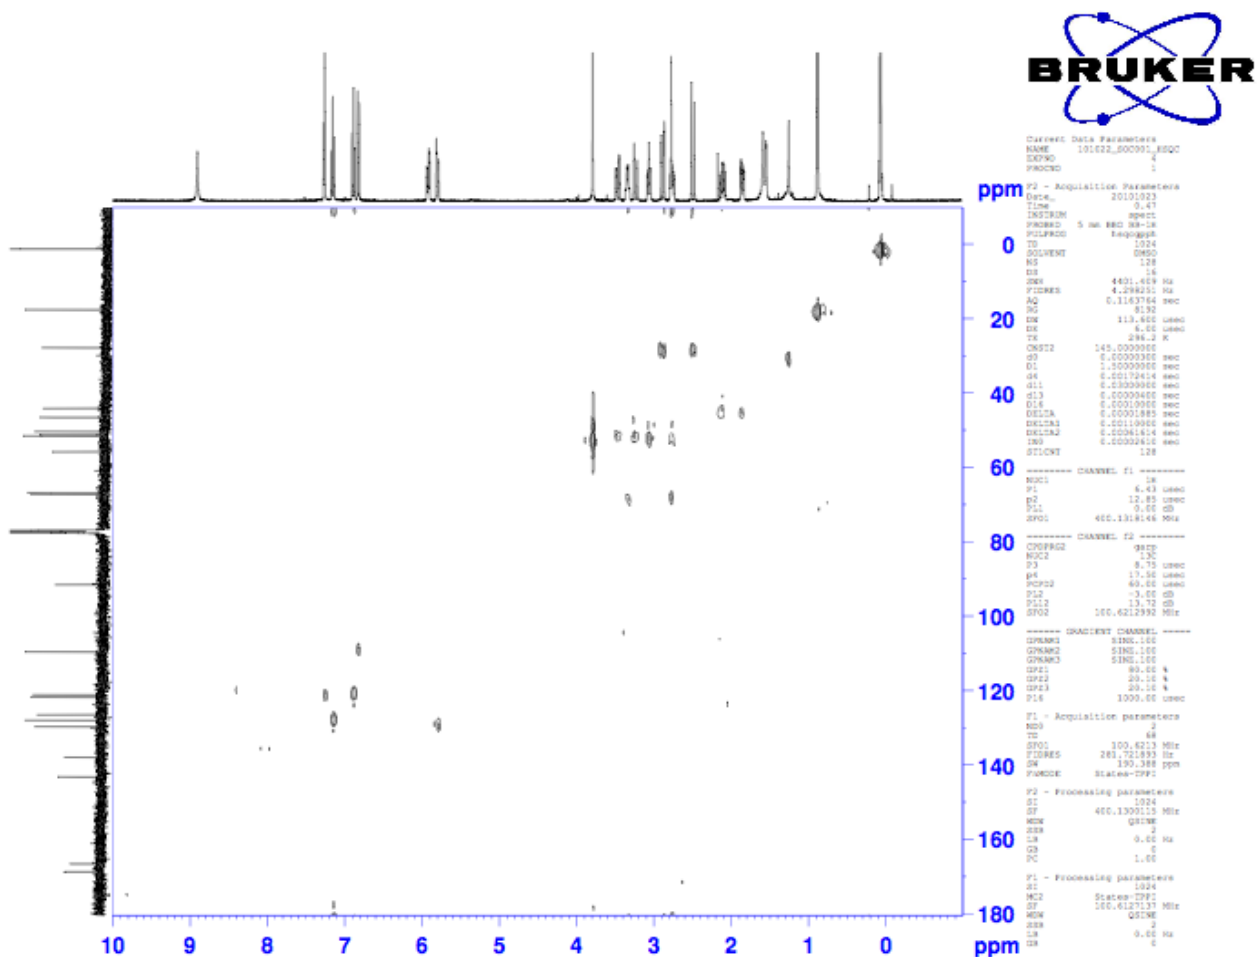

Figure S4.  $^1\text{H}$ ,  $^{13}\text{C}$  HSQC spectrum of 19-hydroxytabersonine.

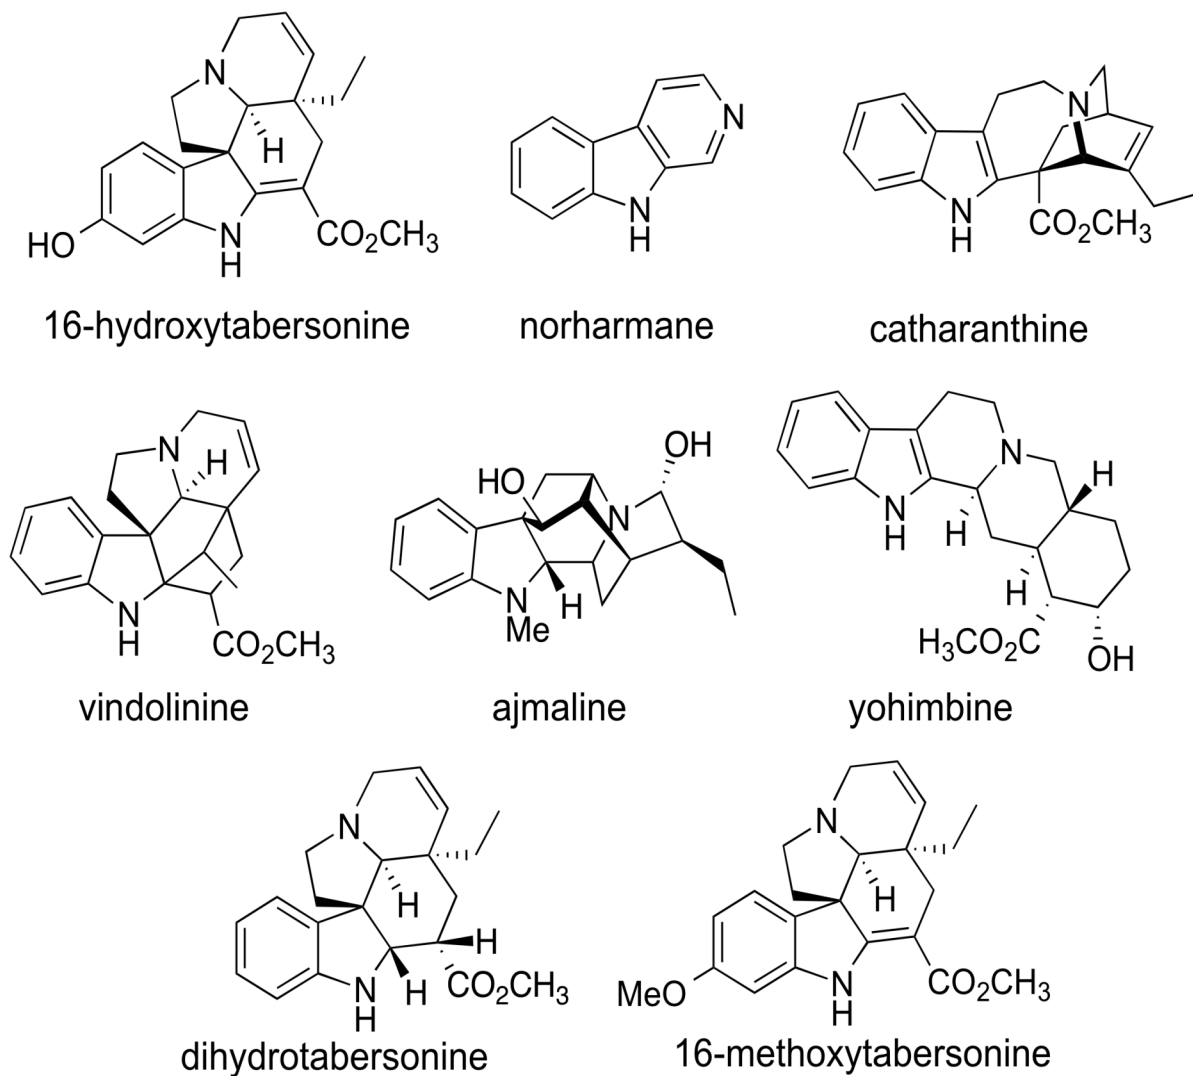

**Figure S5.** Substrates that were not turned over by enriched CYP71BJ1 microsomes

## Supplemental Data - Giddings et al.

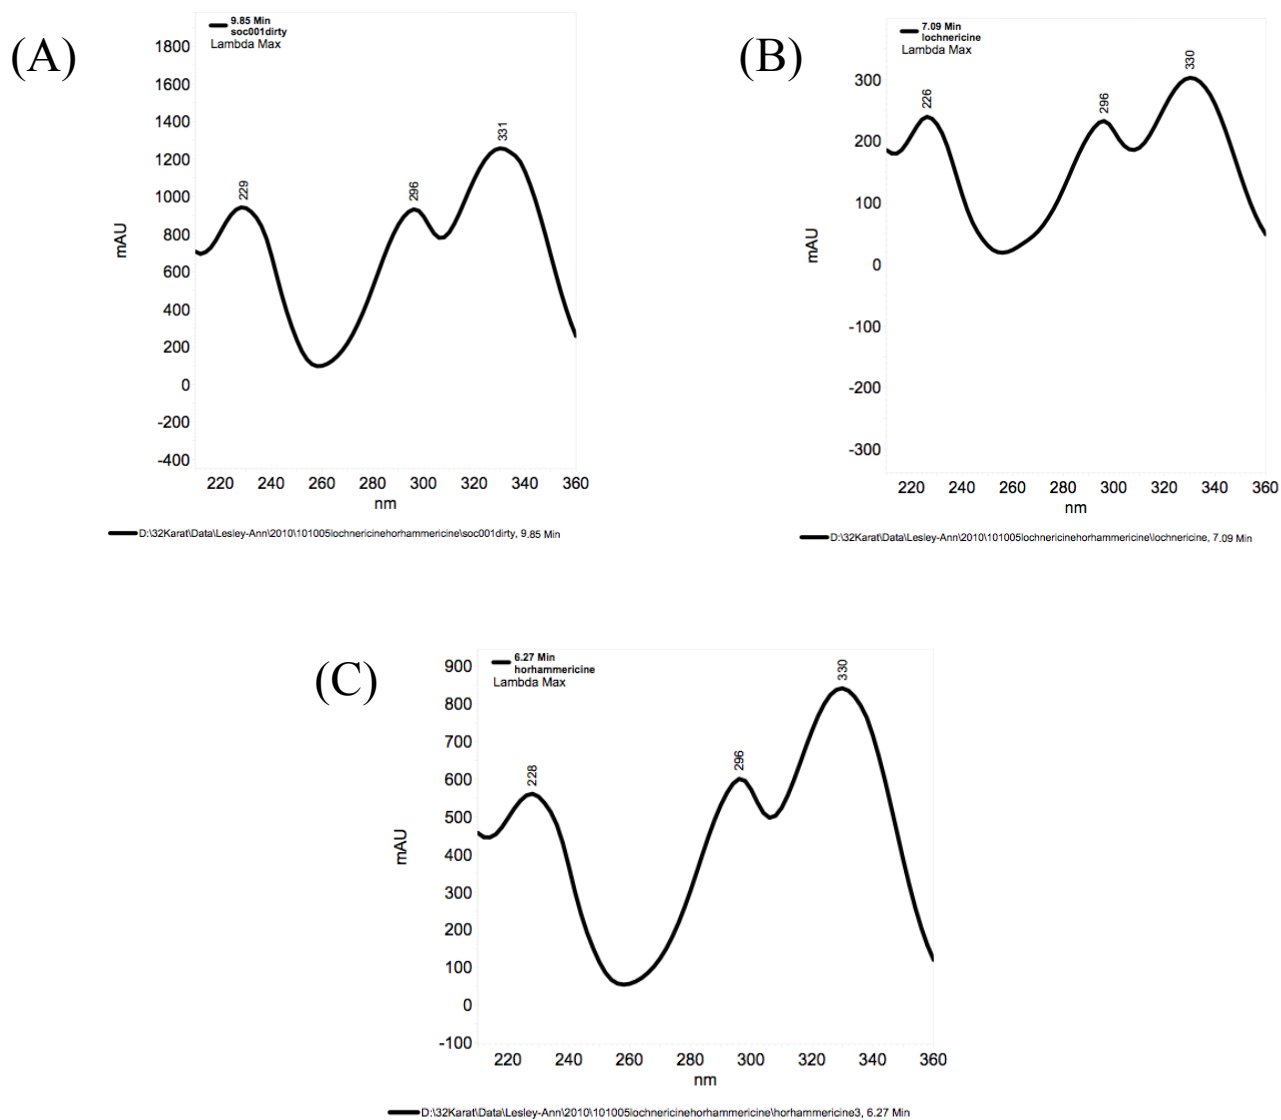

**Figure S6.** UV spectra of 19-hydroxytabersonine (A), lochnericine (B), and horhammericine (C) isolated from *C. roseus* hairy root cultures.

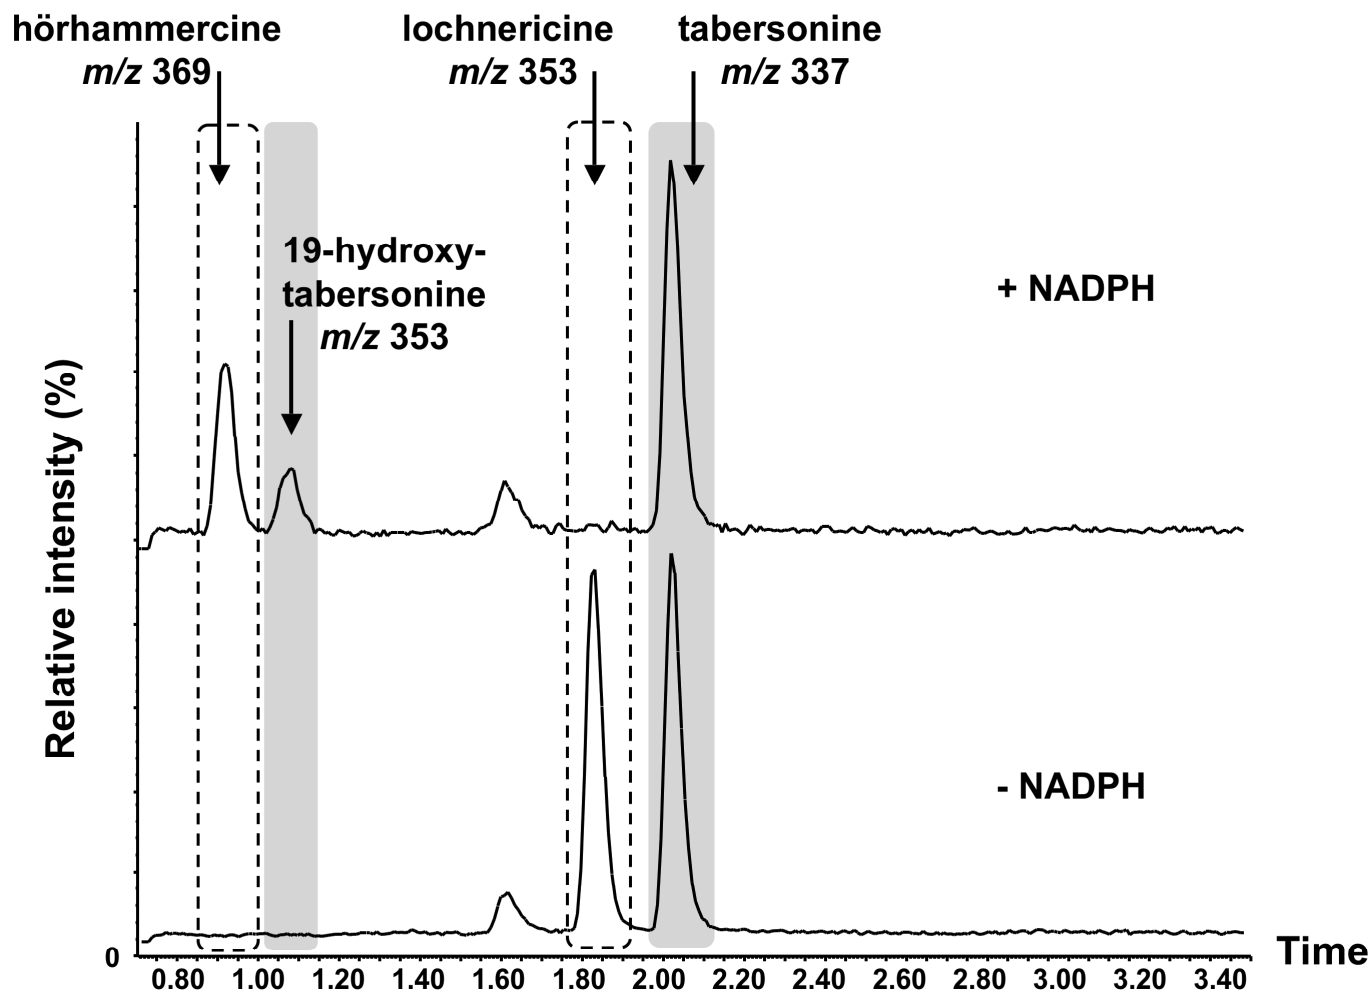

**Figure S7.** Incubation of microsomes containing CYP71BJ1 with a 1-1 mixture of tabersonine and lochnericine (55  $\mu$ M concentration) in the presence and absence of NADPH. Samples were incubated for 15 hours at 30°C; conditions were as reported in Materials and Methods. Assays were analyzed by LC-MS.

**Table S1.** Exact mass data for compounds assayed with CYP71BJ1.

| Compound              | Calculated Mass | Observed Mass | Error  |
|-----------------------|-----------------|---------------|--------|
| 19-hydroxytabersonine | 353.1860        | 353.1848      | 0.0012 |
| lochnericine          | 353.1860        | 353.1866      | 0.0006 |
| hörhammericine        | 369.1809        | 369.1804      | 0.0005 |
| 16-hydroxytabersonine | 353.1860        | 353.1857      | 0.0003 |
| 16-methoxytabersonine | 367.2016        | 367.2006      | 0.0010 |
